# Supplementary material
Source: MDPI journal article supplement (https://www.mdpi.com/2073-4352/13/10/1449)
Supplement: s1 [file s1]

**Table S1.** Crystal data and structure refinement for **2**, **3**, and **4·2CH<sub>3</sub>CN**.

| Compound                                             | <b>2</b>                                                                            | <b>3</b>                                                                           | <b>4·2CH<sub>3</sub>CN</b>                                                         |
|------------------------------------------------------|-------------------------------------------------------------------------------------|------------------------------------------------------------------------------------|------------------------------------------------------------------------------------|
| Empirical formula                                    | C <sub>34</sub> H <sub>51</sub> B <sub>12</sub> CdN <sub>7</sub> O <sub>3</sub>     | C <sub>24</sub> H <sub>32</sub> N <sub>6</sub> O <sub>4</sub> Zn                   | C <sub>24</sub> H <sub>46</sub> B <sub>12</sub> N <sub>8</sub>                     |
| Formula weight                                       | 847.93                                                                              | 533.92                                                                             | 576.41                                                                             |
| Temperature/K                                        | 100.00                                                                              | 100.00                                                                             | 100.00                                                                             |
| Crystal system                                       | triclinic                                                                           | monoclinic                                                                         | triclinic                                                                          |
| Space group                                          | <i>P</i> -1                                                                         | <i>P</i> 2 <sub>1</sub> / <i>n</i>                                                 | <i>P</i> -1                                                                        |
| <i>a</i> /Å                                          | 10.494(2)                                                                           | 13.8012(15)                                                                        | 8.036(2)                                                                           |
| <i>b</i> /Å                                          | 12.322(4)                                                                           | 12.687(2)                                                                          | 10.416(4)                                                                          |
| <i>c</i> /Å                                          | 18.644(6)                                                                           | 15.896(2)                                                                          | 10.700(4)                                                                          |
| $\alpha$ /°                                          | 79.582(13)                                                                          | 90                                                                                 | 106.211(14)                                                                        |
| $\beta$ /°                                           | 87.114(11)                                                                          | 115.116(5)                                                                         | 91.220(12)                                                                         |
| $\gamma$ /°                                          | 75.755(11)                                                                          | 90                                                                                 | 109.216(10)                                                                        |
| Volume/Å <sup>3</sup>                                | 2298.1(12)                                                                          | 2520.3(7)                                                                          | 805.8(4)                                                                           |
| <i>Z</i>                                             | 2                                                                                   | 4                                                                                  | 1                                                                                  |
| $\rho_{\text{calc}}/\text{cm}^3$                     | 1.225                                                                               | 1.407                                                                              | 1.188                                                                              |
| $\mu/\text{mm}^{-1}$                                 | 0.515                                                                               | 1.016                                                                              | 0.067                                                                              |
| <i>F</i> (000)                                       | 872.0                                                                               | 1120.0                                                                             | 306.0                                                                              |
| Radiation                                            | MoK $\alpha$ ( $\lambda$ = 0.71073)                                                 | MoK $\alpha$ ( $\lambda$ = 0.71073)                                                | MoK $\alpha$ ( $\lambda$ = 0.71073)                                                |
| Index ranges                                         | -13 ≤ <i>h</i> ≤ 13,<br>-16 ≤ <i>k</i> ≤ 12,<br>-24 ≤ <i>l</i> ≤ 18                 | -19 ≤ <i>h</i> ≤ 19,<br>-17 ≤ <i>k</i> ≤ 13,<br>-22 ≤ <i>l</i> ≤ 22                | -11 ≤ <i>h</i> ≤ 11,<br>-10 ≤ <i>k</i> ≤ 14,<br>-15 ≤ <i>l</i> ≤ 14                |
| Reflections collected                                | 14162                                                                               | 20891                                                                              | 6246                                                                               |
| Independent reflections                              | 10200<br>[ <i>R</i> <sub>int</sub> = 0.0263,<br><i>R</i> <sub>sigma</sub> = 0.0803] | 7064<br>[ <i>R</i> <sub>int</sub> = 0.0333,<br><i>R</i> <sub>sigma</sub> = 0.0422] | 4553<br>[ <i>R</i> <sub>int</sub> = 0.0221,<br><i>R</i> <sub>sigma</sub> = 0.0549] |
| Data/restraints/parameters                           | 10200/0/520                                                                         | 7064/0/339                                                                         | 4553/0/201                                                                         |
| Goodness-of-fit on <i>F</i> <sup>2</sup>             | 1.021                                                                               | 1.028                                                                              | 1.037                                                                              |
| Final <i>R</i> indexes [ <i>I</i> ≥ 2σ ( <i>I</i> )] | <i>R</i> <sub>1</sub> = 0.0503,<br>w <i>R</i> <sub>2</sub> = 0.1050                 | <i>R</i> <sub>1</sub> = 0.0336,<br>w <i>R</i> <sub>2</sub> = 0.0728                | <i>R</i> <sub>1</sub> = 0.0483,<br>w <i>R</i> <sub>2</sub> = 0.1084                |
| Final <i>R</i> indexes [all data]                    | <i>R</i> <sub>1</sub> = 0.0727,<br>w <i>R</i> <sub>2</sub> = 0.1149                 | <i>R</i> <sub>1</sub> = 0.0506,<br>w <i>R</i> <sub>2</sub> = 0.0784                | <i>R</i> <sub>1</sub> = 0.0656,<br>w <i>R</i> <sub>2</sub> = 0.1171                |

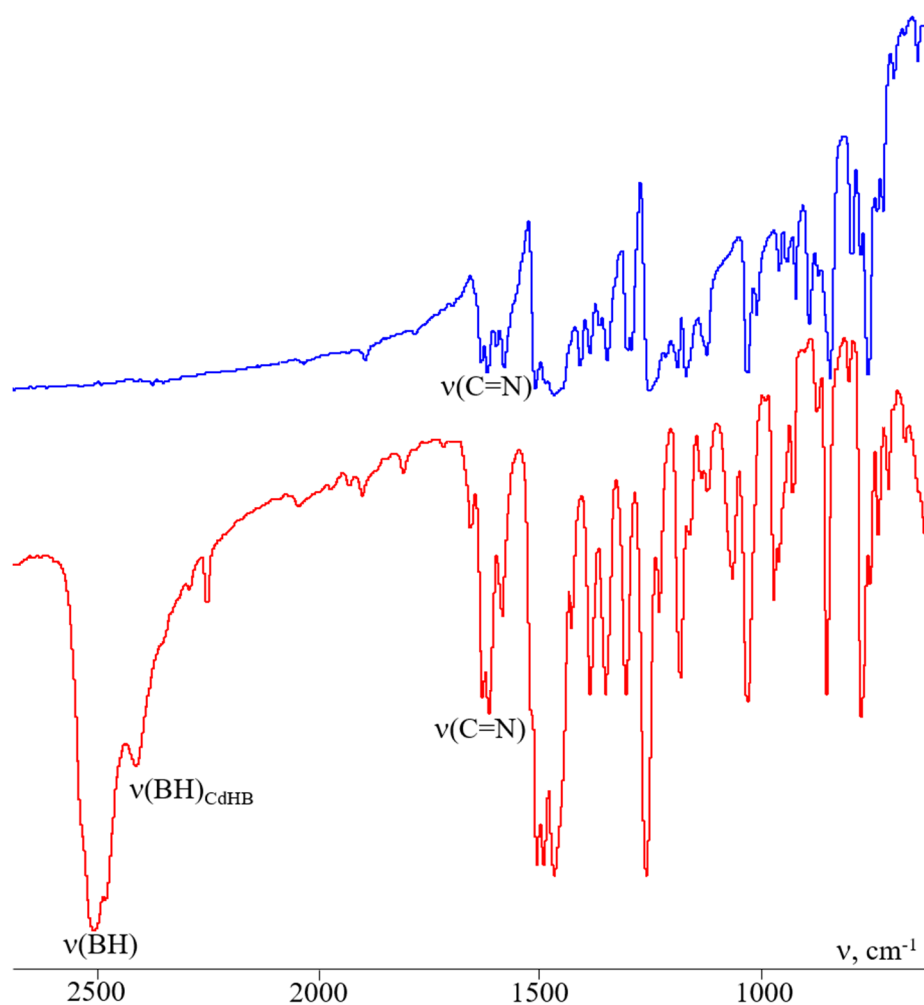

**Figure S1.** IR spectra of ligand  $L^1$  (blue) and complex **1** (red).

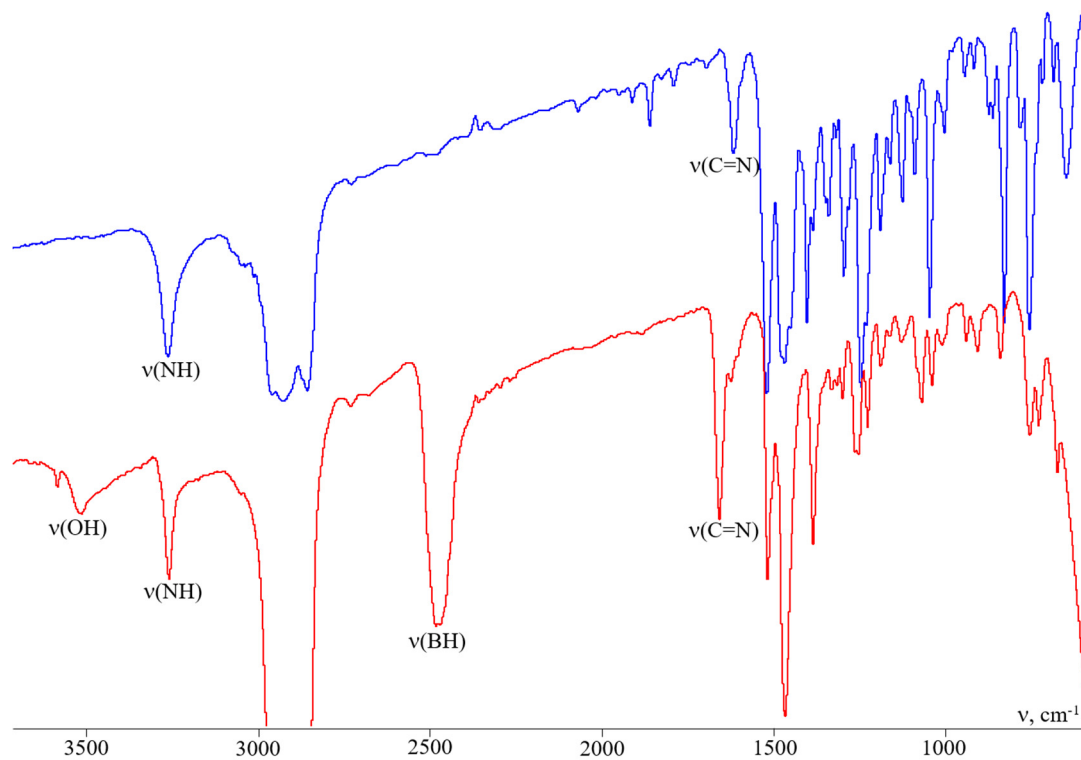

**Figure S2.** IR spectra of ligand  $L^2$  (blue) and complex **2** (red).

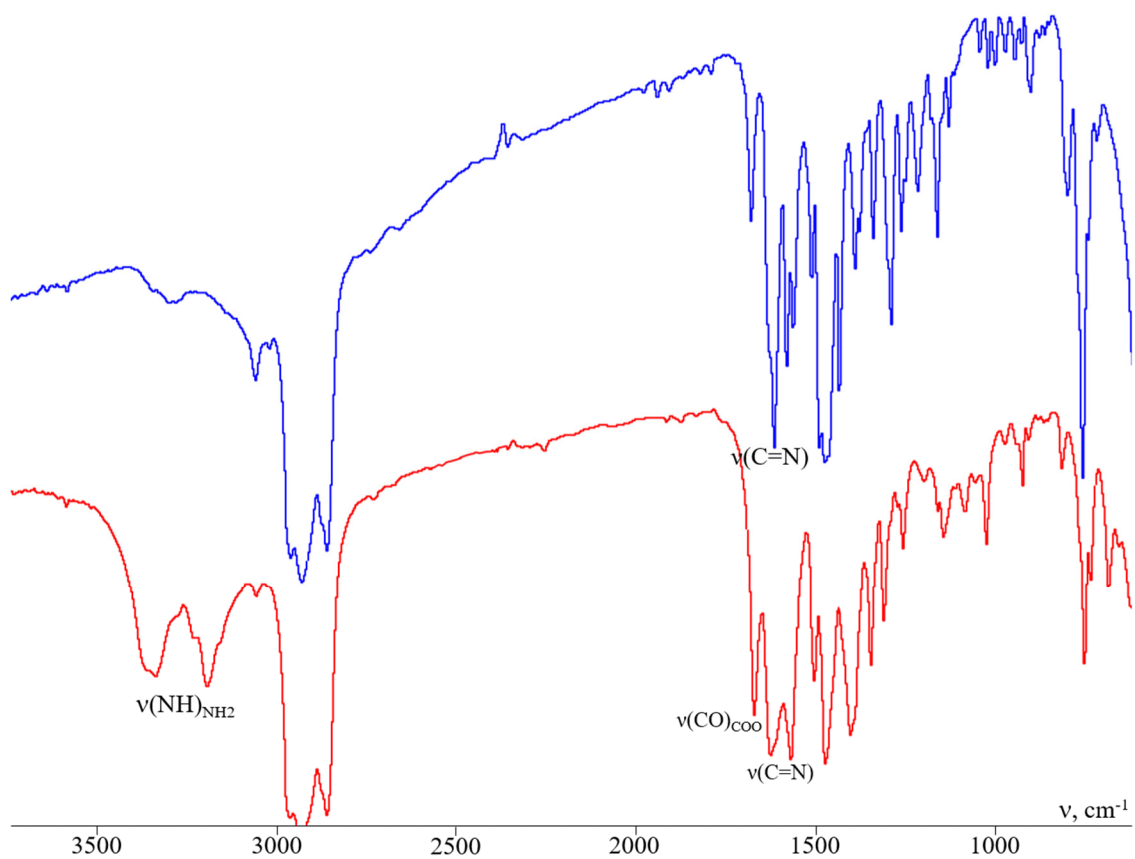

**Figure S3.** IR spectra of ligand  $L^3$  (blue) and complex 3 (red).

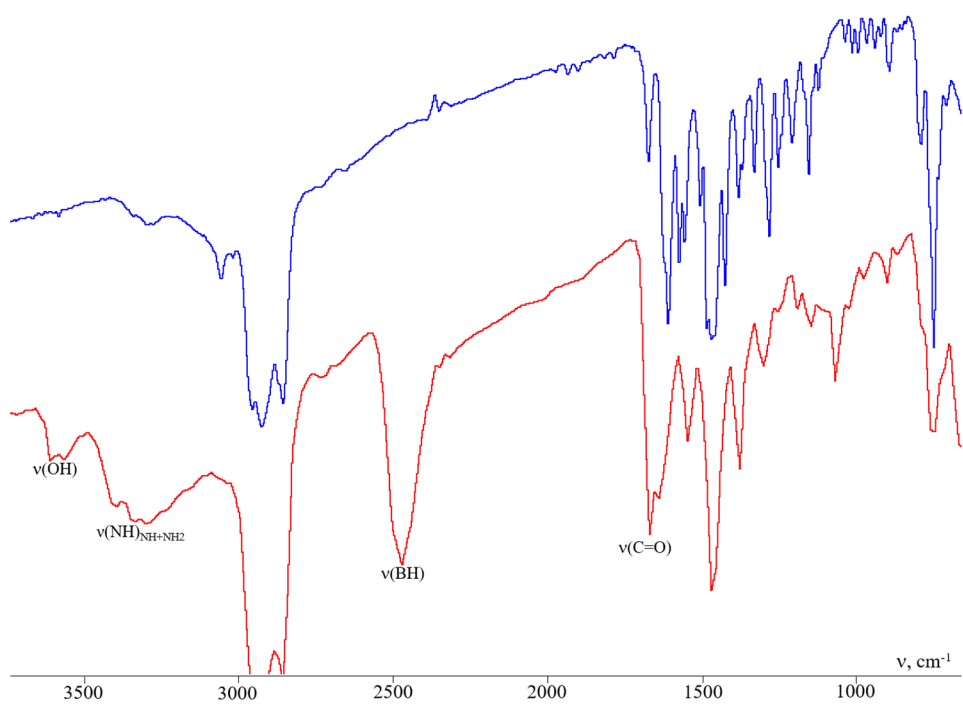

**Figure S4.** IR spectra of ligand  $L^3$  (blue) and a precipitate containing  $(HBz-NH_2)_2[B_{12}H_{12}]$  (**4**) and a cadmium(II) complex with salicylaldehyde (red).

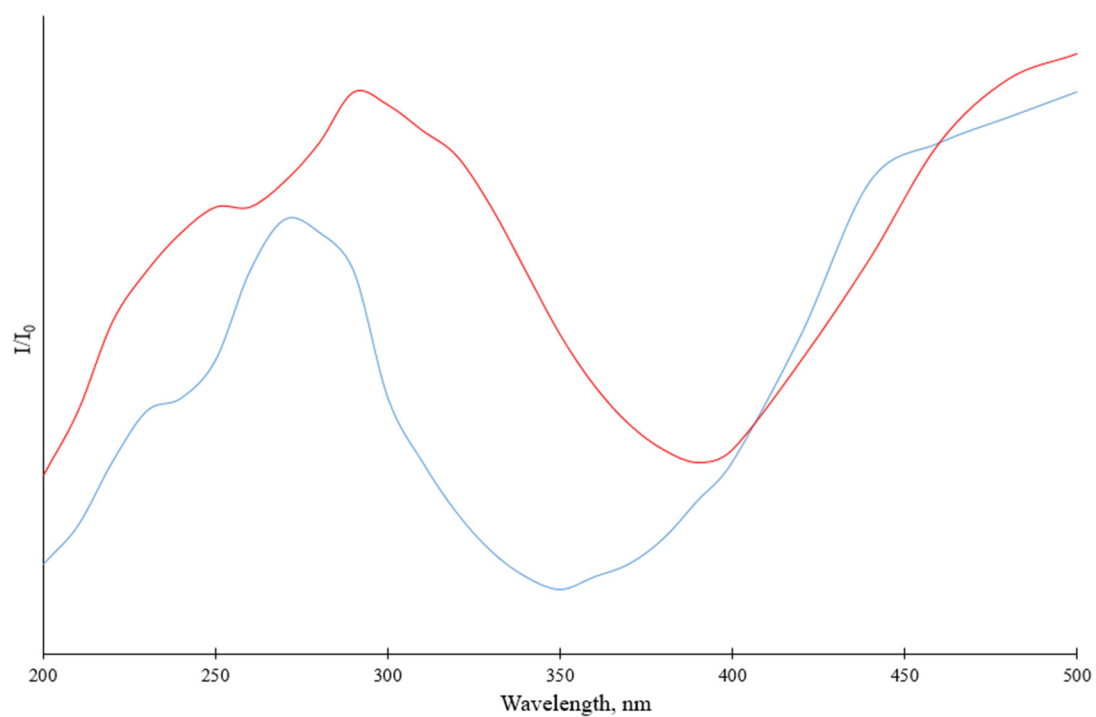

**Figure S5.** UV-vis absorption spectra of ligand  $L^1$  (blue) and complex **1** (red).

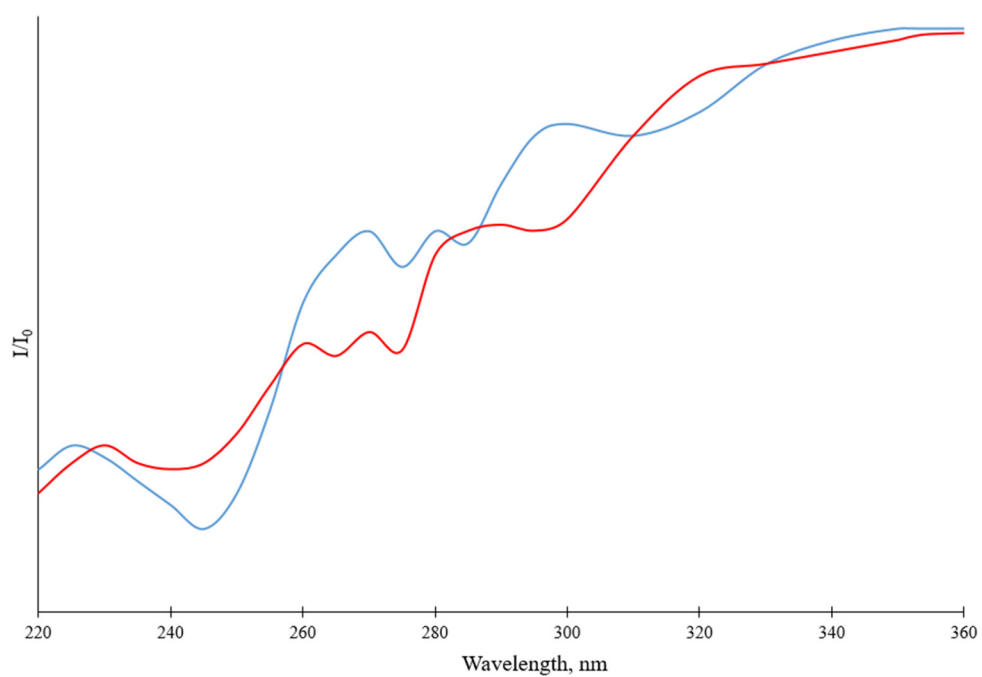

**Figure S6.** UV-vis absorption spectra of ligand  $L^2$  (blue) and complex **2** (red).

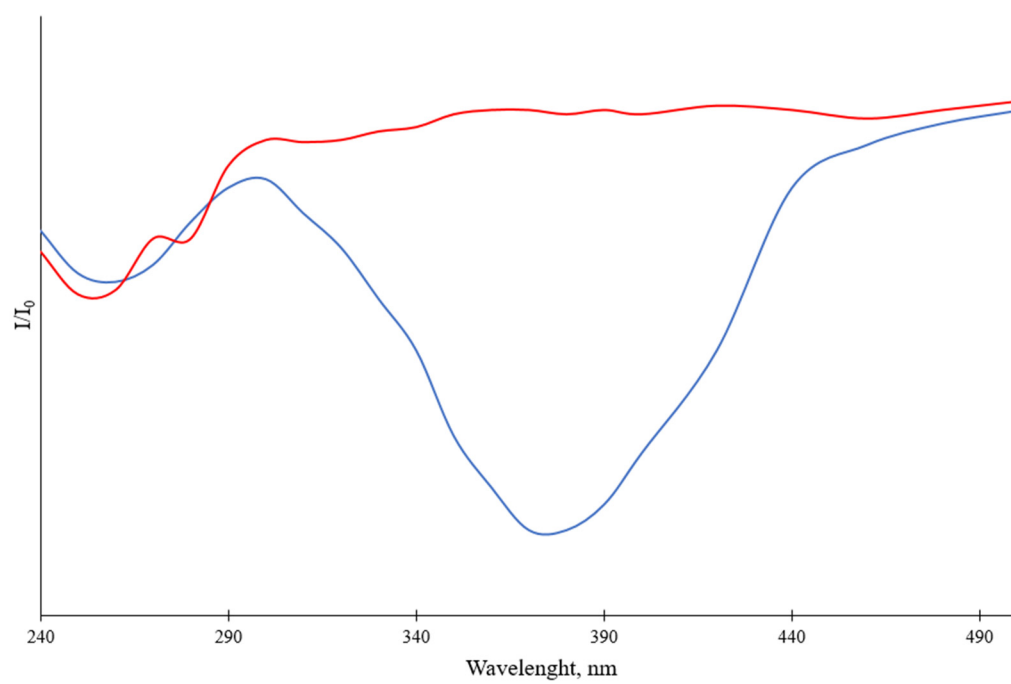

**Figure S7.** UV-vis absorption spectra of ligand  $L^3$  (blue) and complex **3** (red).

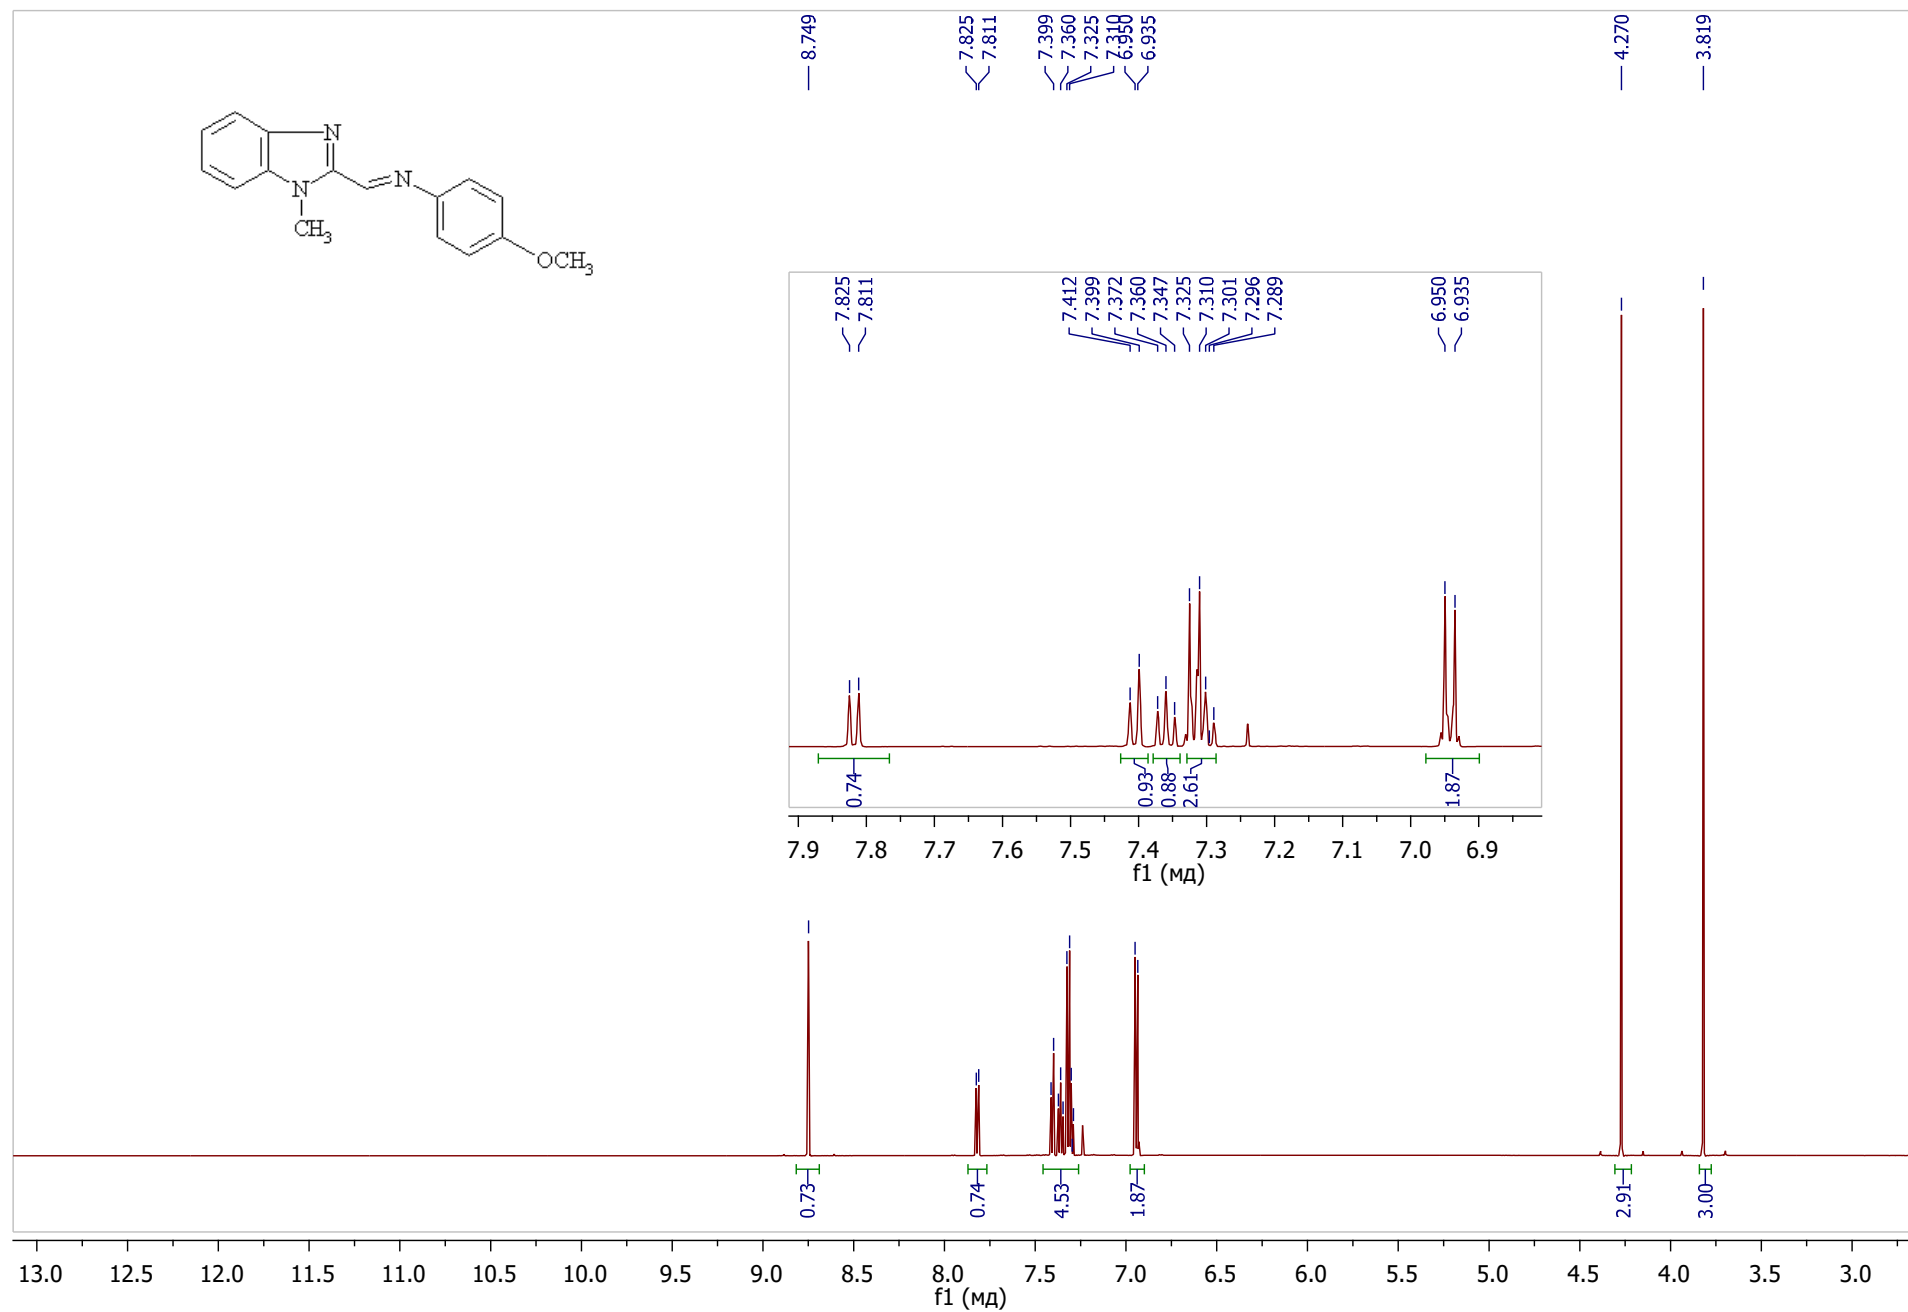

**Figure S8.**  $^1\text{H}$  NMR spectrum of *N*-(4-methoxyphenyl)-1-(1-methylbenzimidazol-2-yl)methanimine ( $L^1$ ).

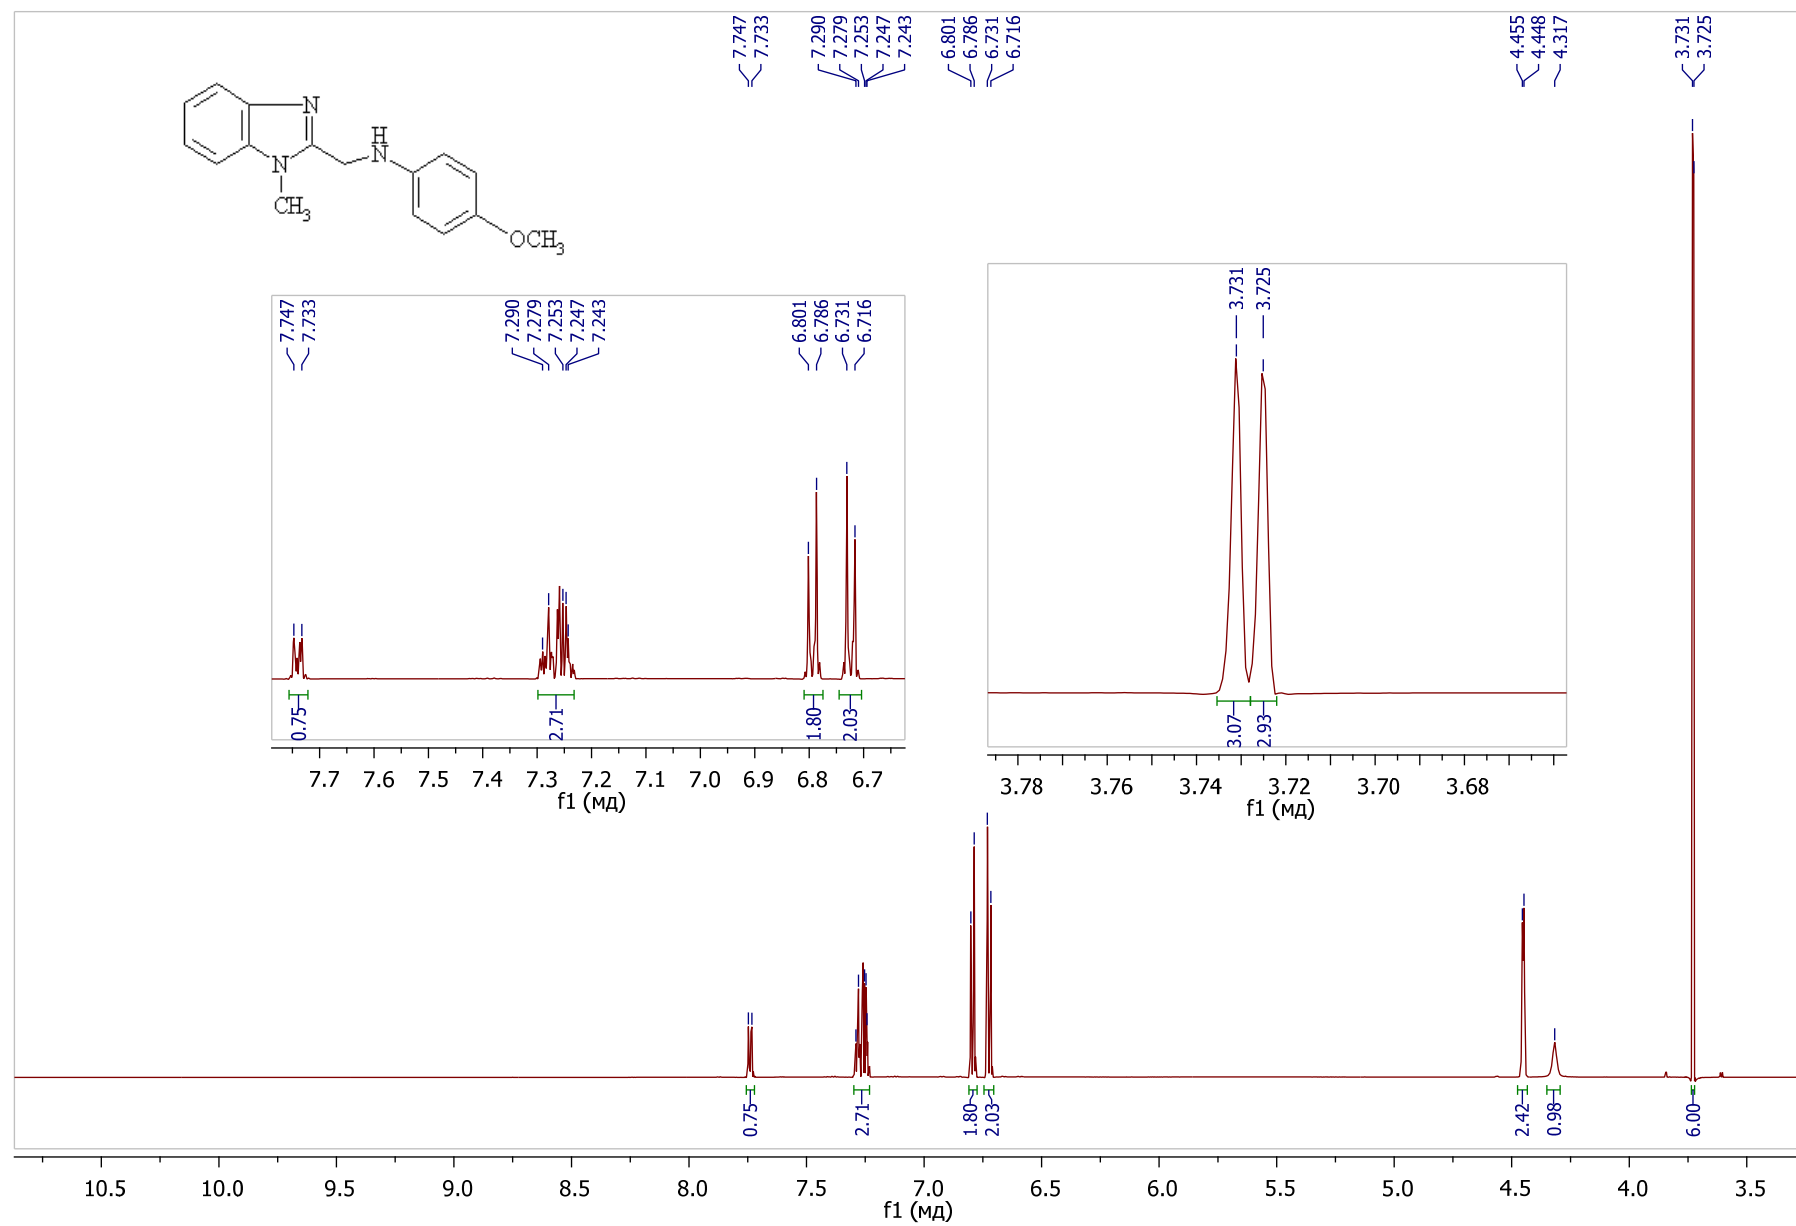

**Figure S9.** <sup>1</sup>H NMR spectrum of 4-methoxy-*N*-[(1-methylbenzimidazol-2-yl)methyl]aniline (L<sup>2</sup>).

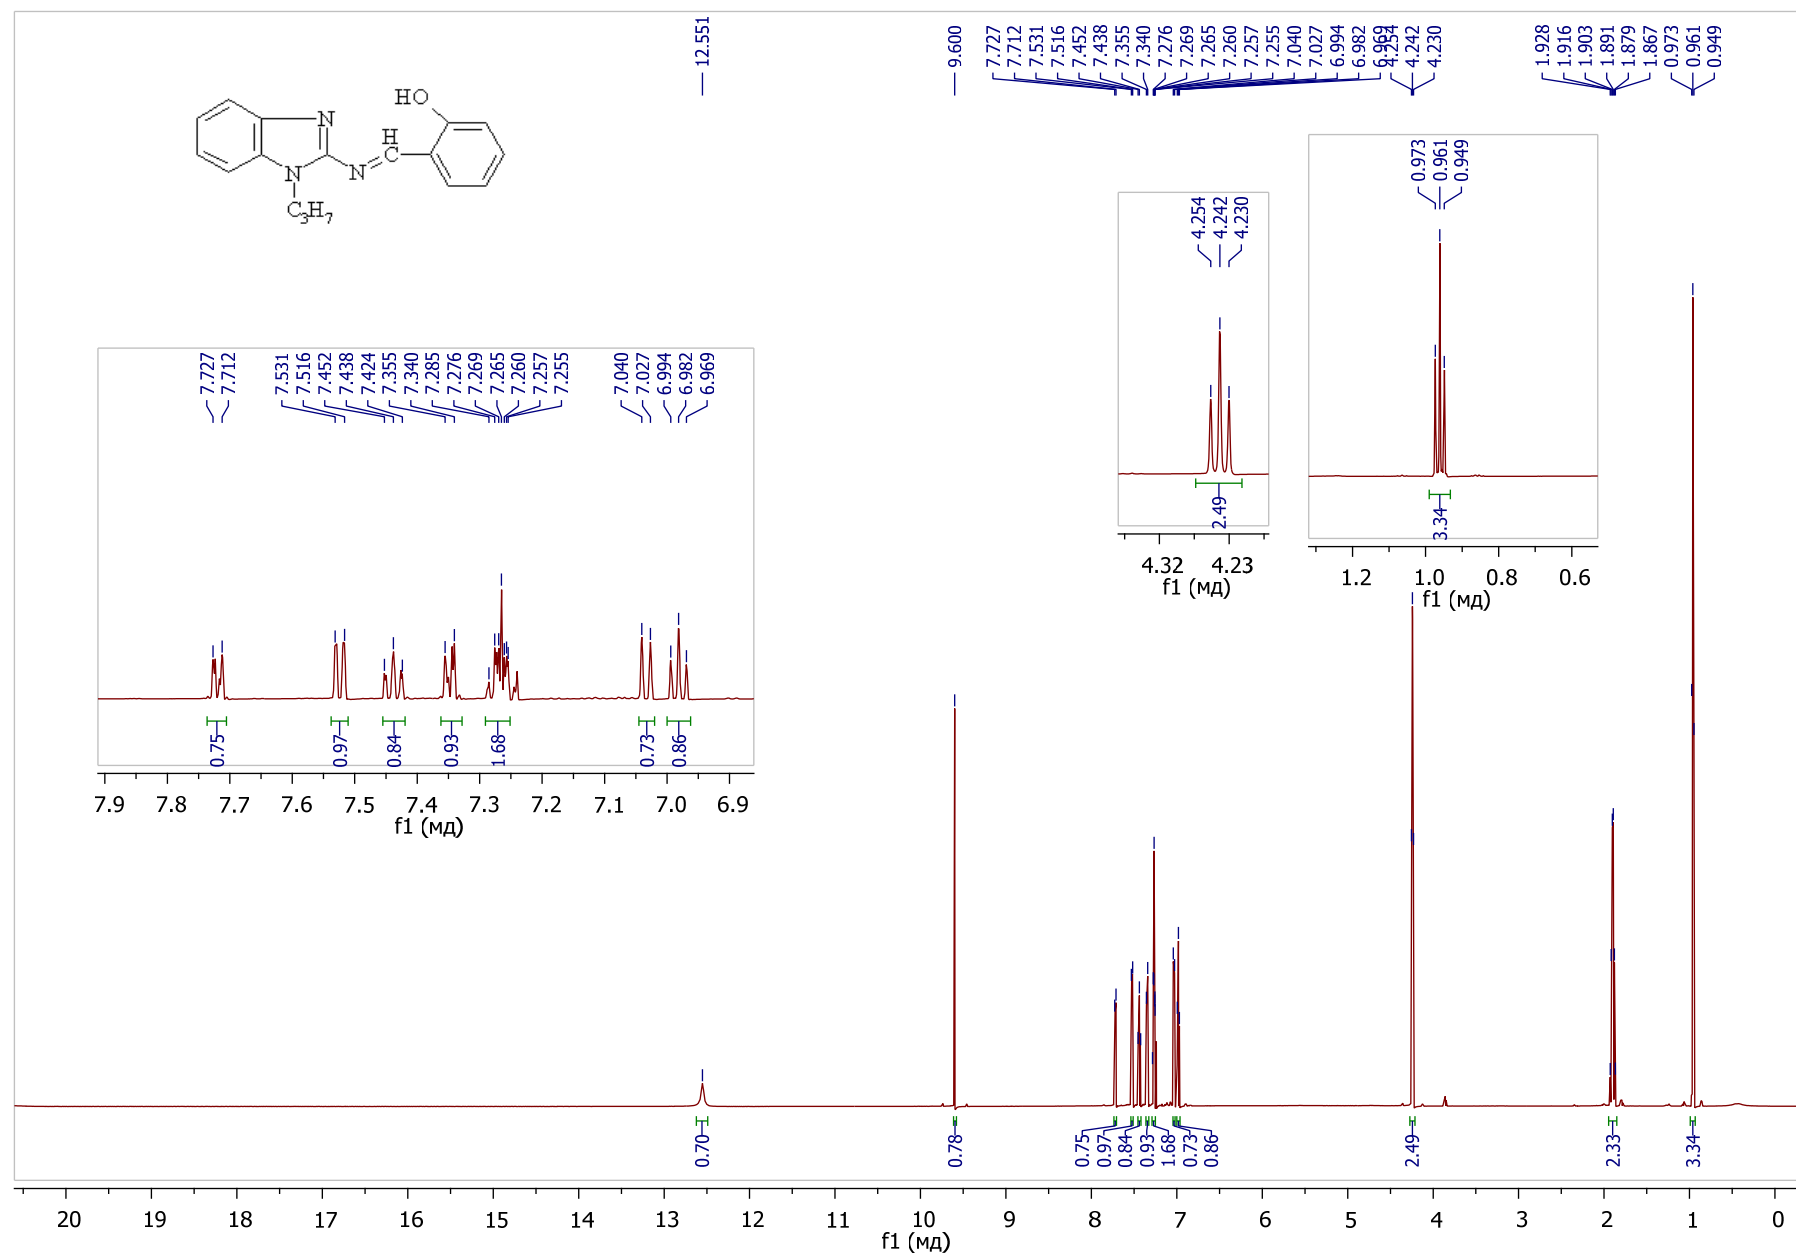

**Figure S10.**  $^1\text{H}$  NMR spectrum of 2-[(*E*)-(1-propylbenzimidazol-2-yl)iminomethyl]phenol ( $L^3$ ).



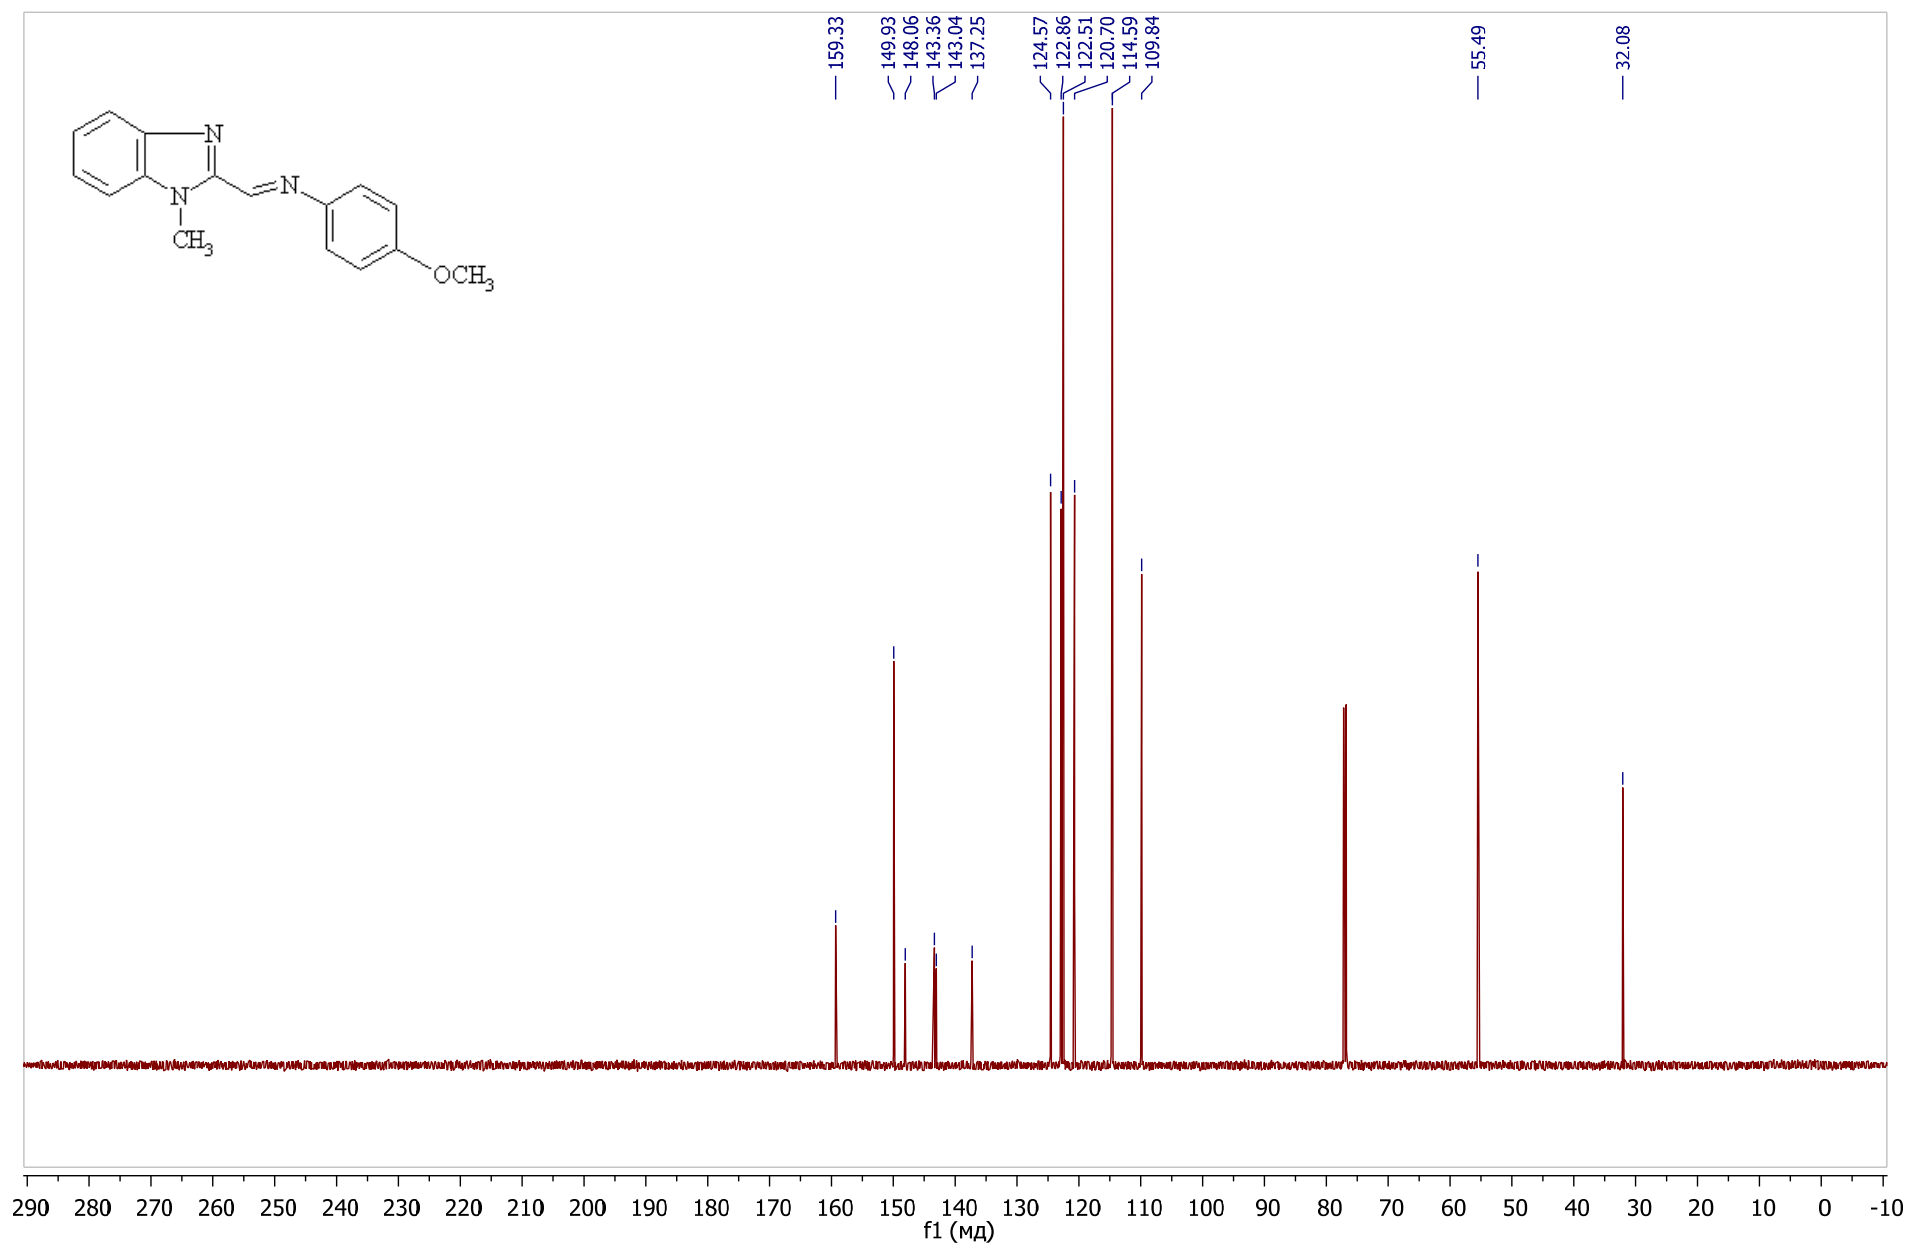

**Figure S11.**  $^{13}\text{C}$  NMR spectrum of *N*-(4-methoxyphenyl)-1-(1-methylbenzimidazol-2-yl)methanimine ( $L^1$ ).

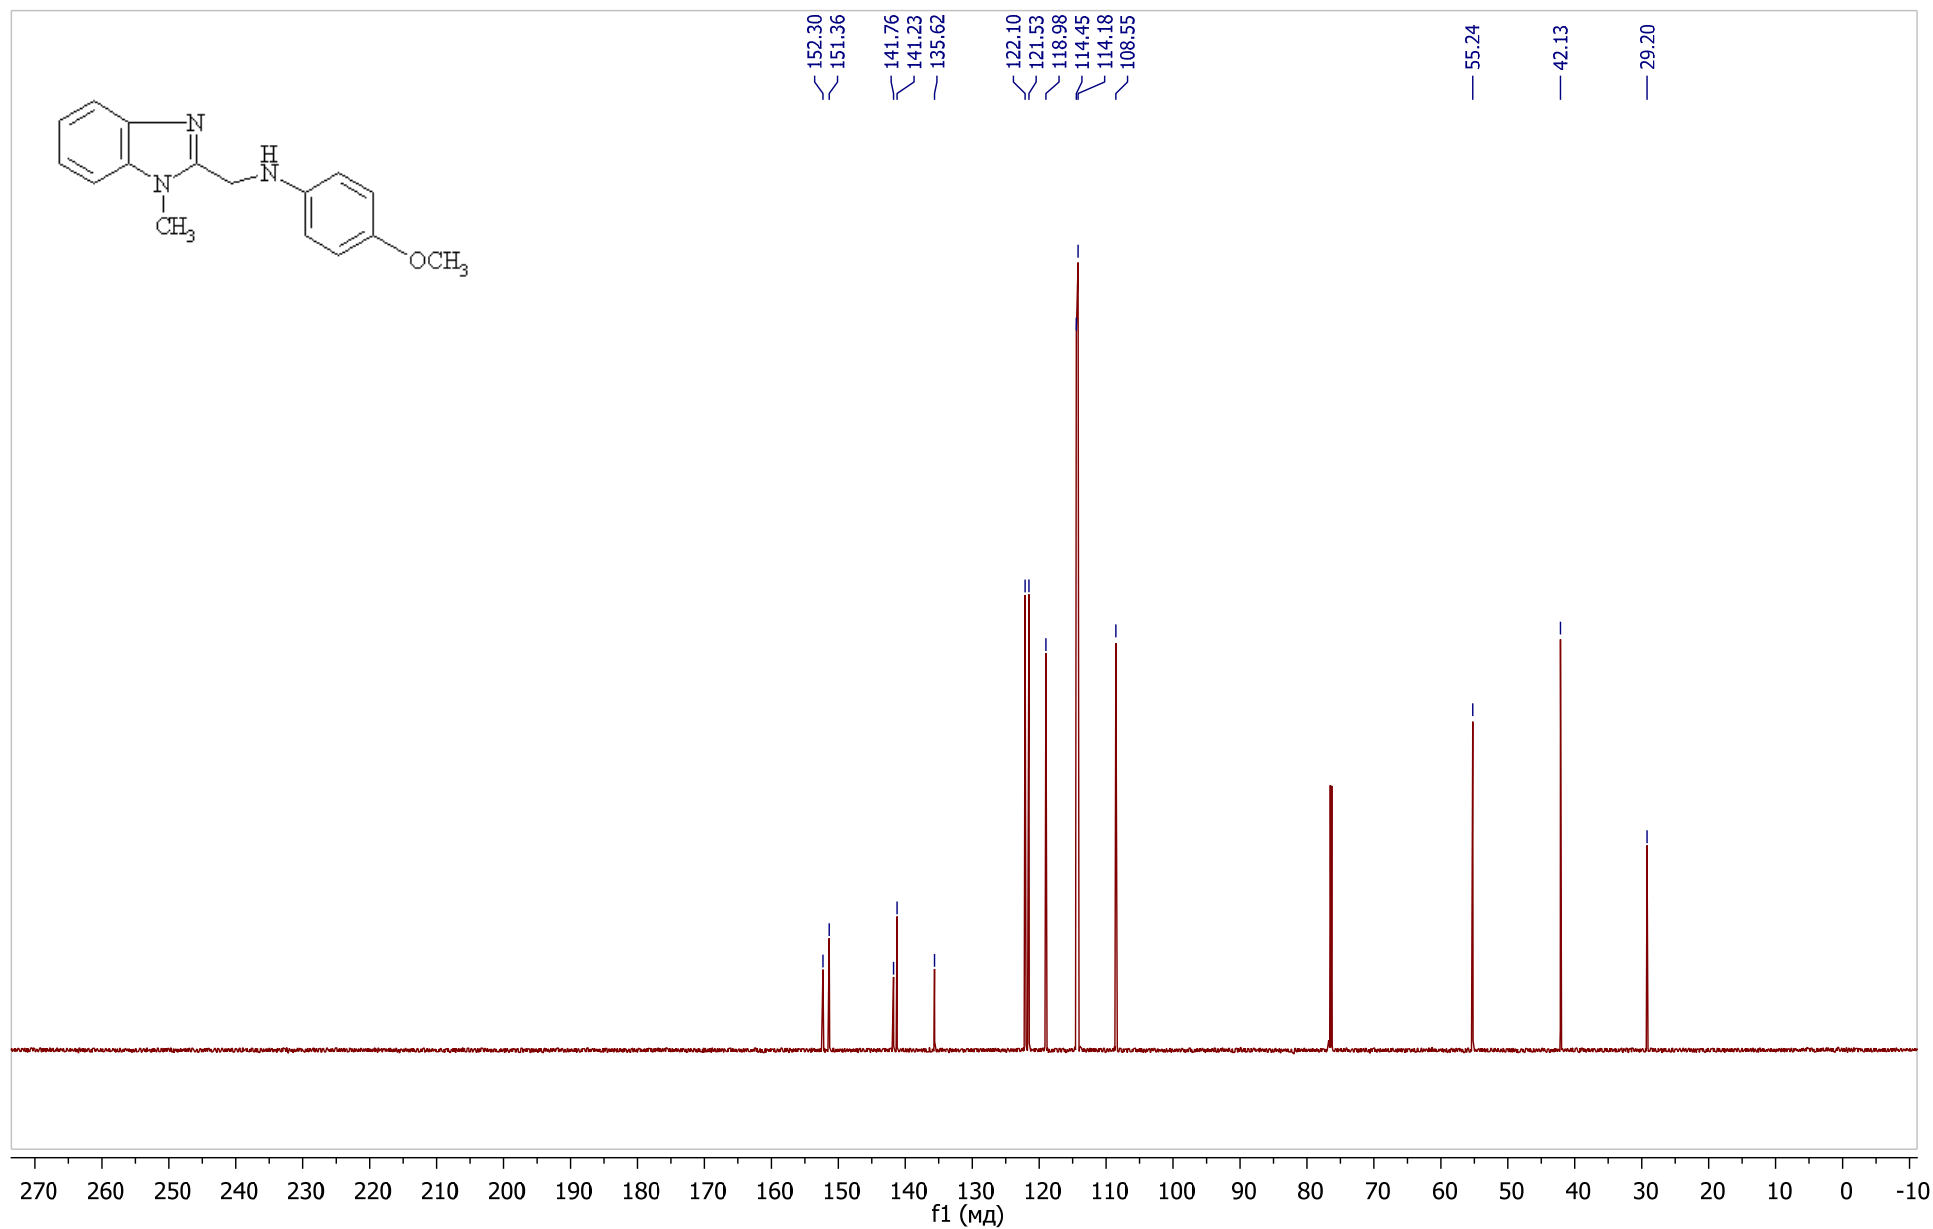

**Figure S12.** <sup>13</sup>C NMR spectrum of 4-methoxy-*N*-[(1-methylbenzimidazol-2-yl)methyl]aniline (L<sup>2</sup>).

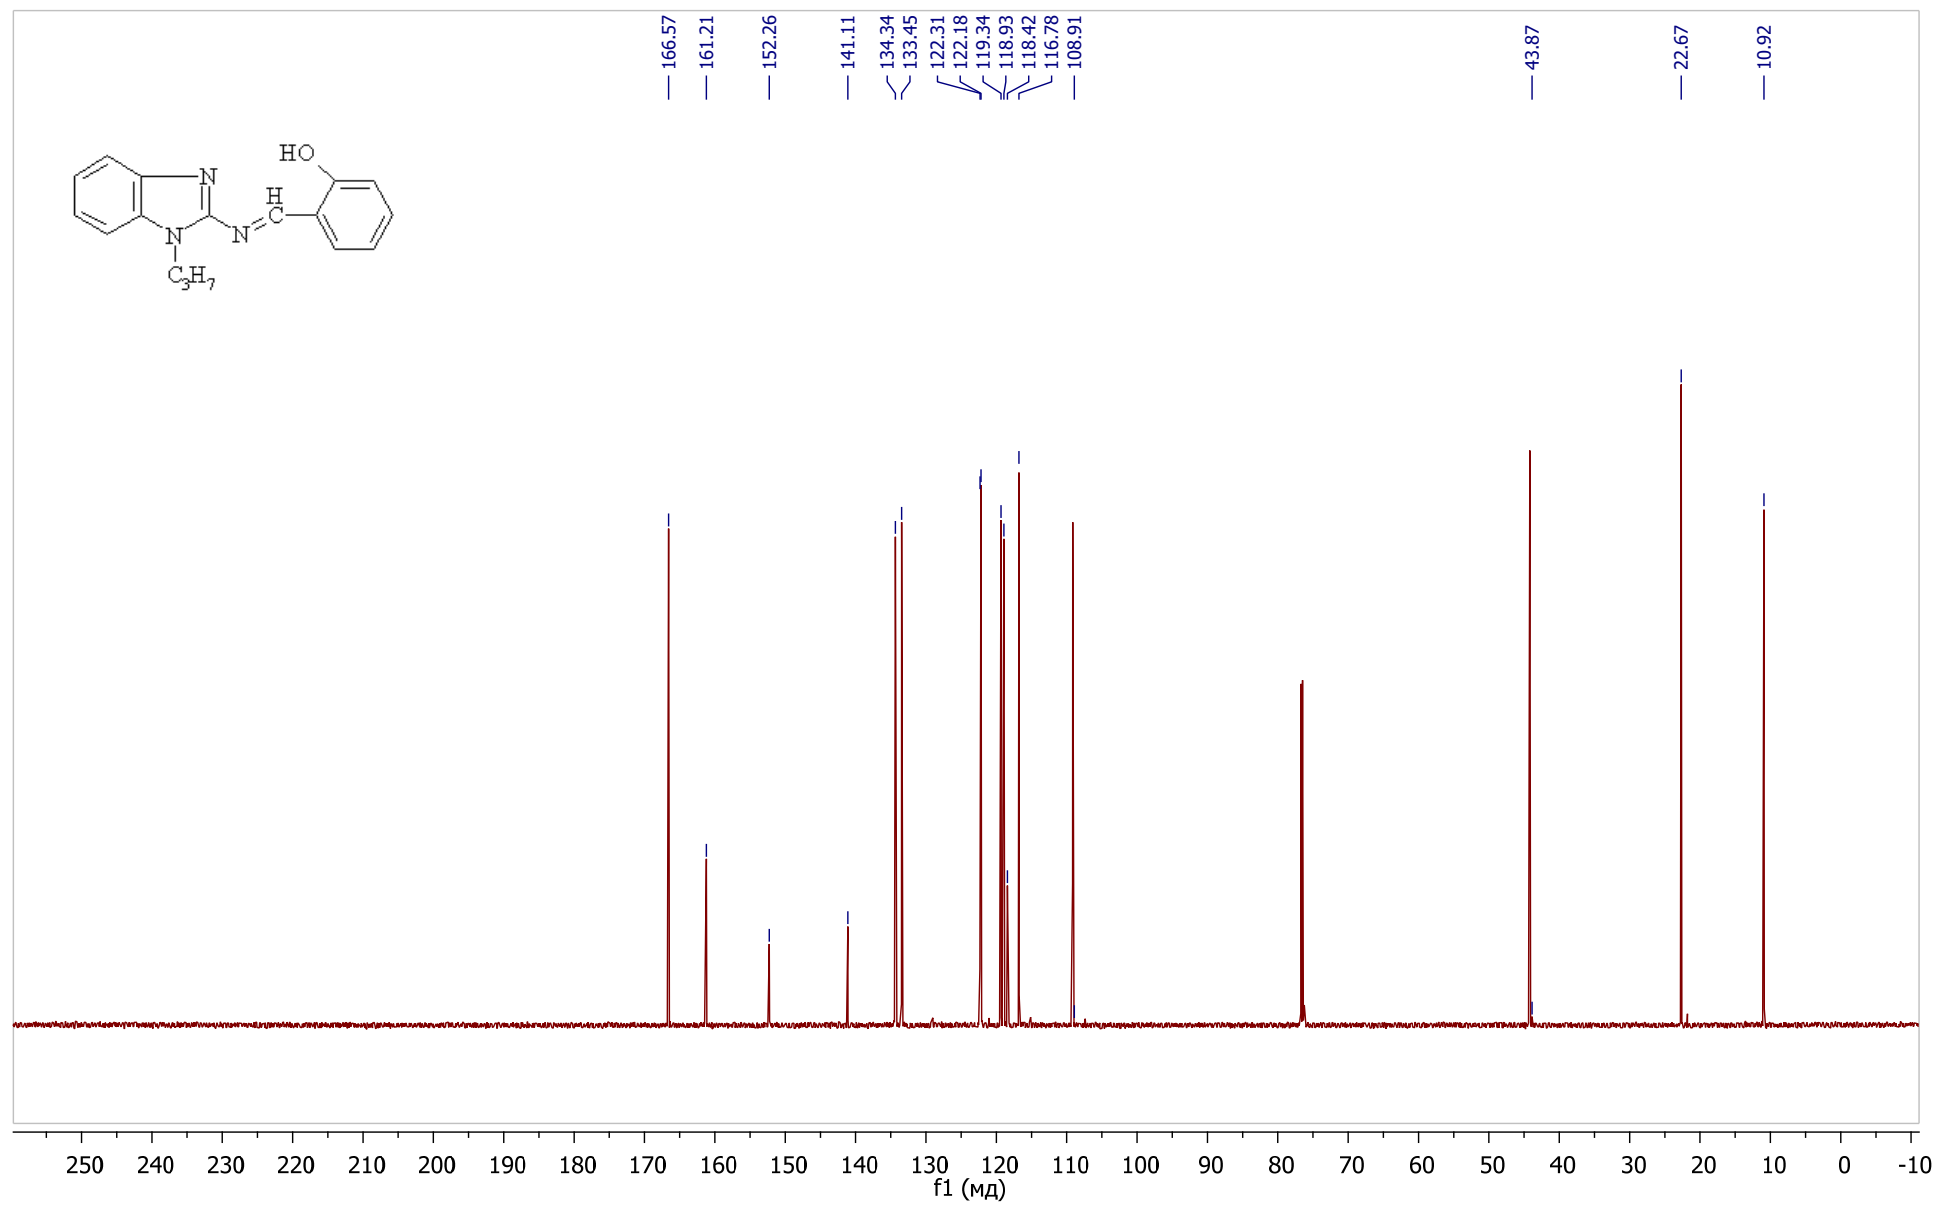

**Figure S13.**  $^{13}\text{C}$  NMR spectrum of 2-[(*E*)-(1-propylbenzimidazol-2-yl)iminomethyl]phenol ( $\text{L}^3$ ).

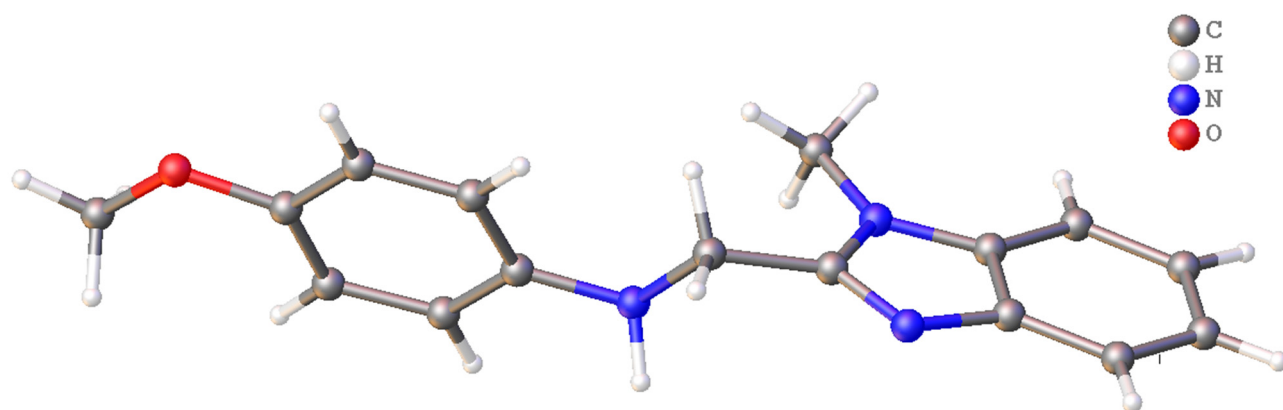

**Figure S14.** Structure of ligand L<sup>2</sup>.
